# Supplementary material
Source: Royal Society of Chemistry journal article supplement (doi:10.1039/d6tc00774k)
Supplement: d6tc00774k1.pdf [file d6tc00774k1.pdf]

### Supplemental Materials: Interlayer Sliding for Magnetic and Topological Phase Control in $\text{Pt}_2\text{HgSe}_3/\text{Nb}_3\text{I}_8$ van der Waals Heterostructure

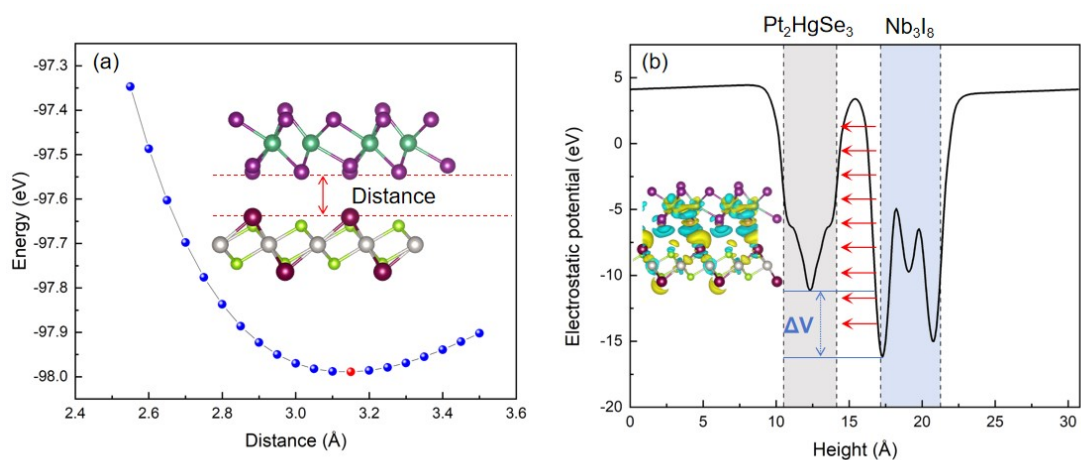

Fig. S1(a) Energy convergence study as a function of interlayer distance. (b) The electrostatic potential curves for  $\text{Pt}_2\text{HgSe}_3/\text{Nb}_3\text{I}_8$  heterostructure. The inset visualizes the interfacial charge redistribution, with yellow (accumulation) and blue (depletion) regions. The resulting charge imbalance causes a potential drop and an electric field, symbolized by red arrows from the interface, forming a built-in field.

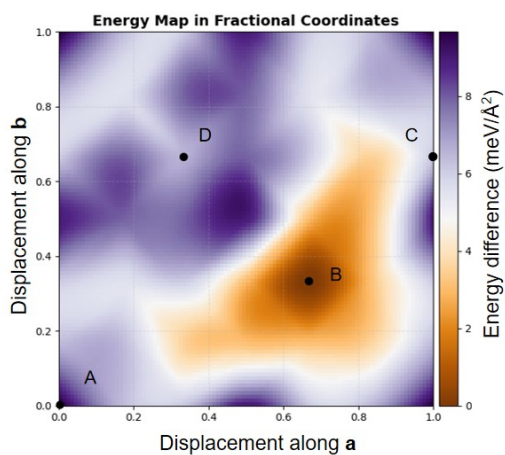

Fig. S2 Evolution of energy as a function of interlayer sliding parameters along a and b.
